# Supplementary material
Source: ML conference proceedings conference paper supplement (https://openaccess.thecvf.com/content/ICCV2021/html/Yuksel_LatentCLR_A_Contrastive_ICCV_2021_paper.html)

# Supplementary Material for “LatentCLR: A Contrastive Learning Approach for Unsupervised Discovery of Interpretable Directions”

Oğuz Kaan Yüksel<sup>1,†</sup>   Enis Simsar<sup>2,3,†</sup>   Ezgi Gülperi Er<sup>3</sup>   Pinar Yanardag<sup>3</sup>

<sup>1</sup>EPFL

<sup>2</sup>Technical University of Munich

<sup>3</sup>Boğaziçi University

oguz.yuksel@epfl.ch   enis.simsar@tum.de   ezgi.er@boun.edu.tr   yanardag.pinar@gmail.com

**Additional Results.** We present additional results with BigGAN and StyleGAN2 on diverse set of classes and datasets. Note that for BigGAN experiments, all directions are trained only for a single class, Bulbul, and transferred to other classes. In other words, the same direction for zoom learned in Bulbul class also works well under various other categories such as Goose, Trenchcoat and so on.

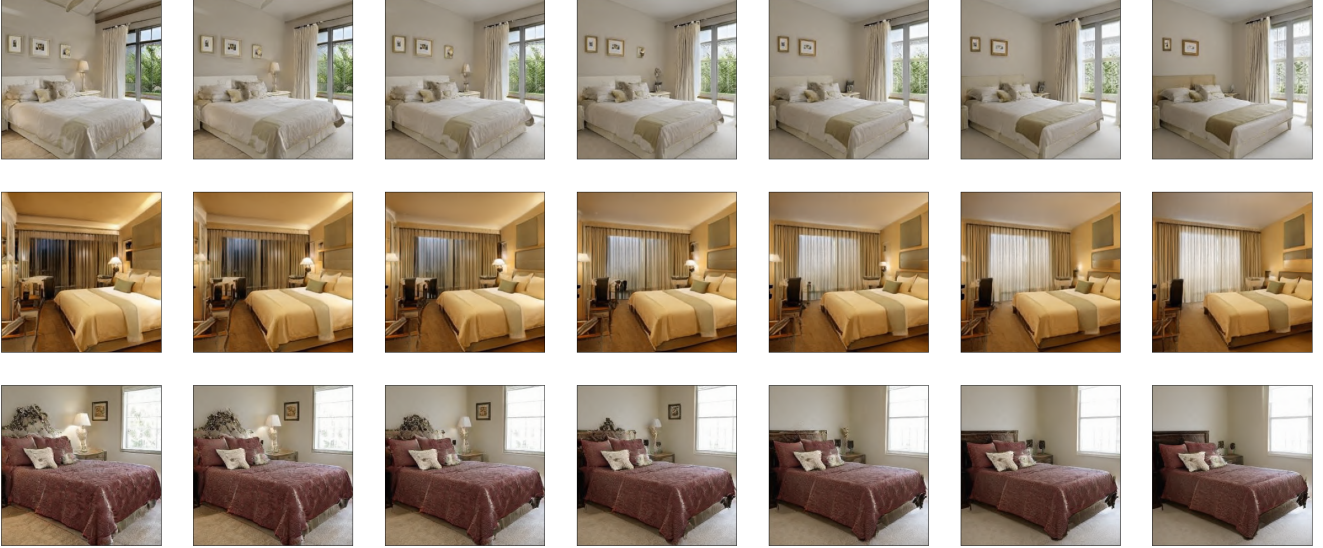

Figure 1: StyleGAN2 Bedrooms - Add/Turn on lamps

<sup>†</sup>Equal contribution. Author ordering determined by a coin flip.

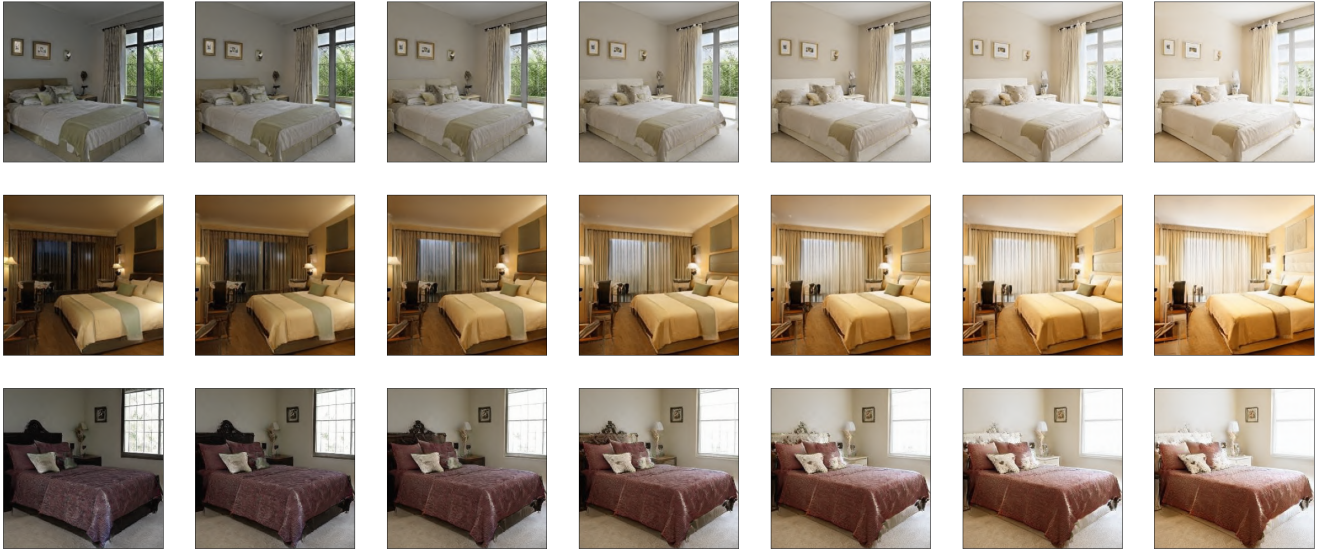

Figure 2: StyleGAN2 Bedrooms - Add sunlight

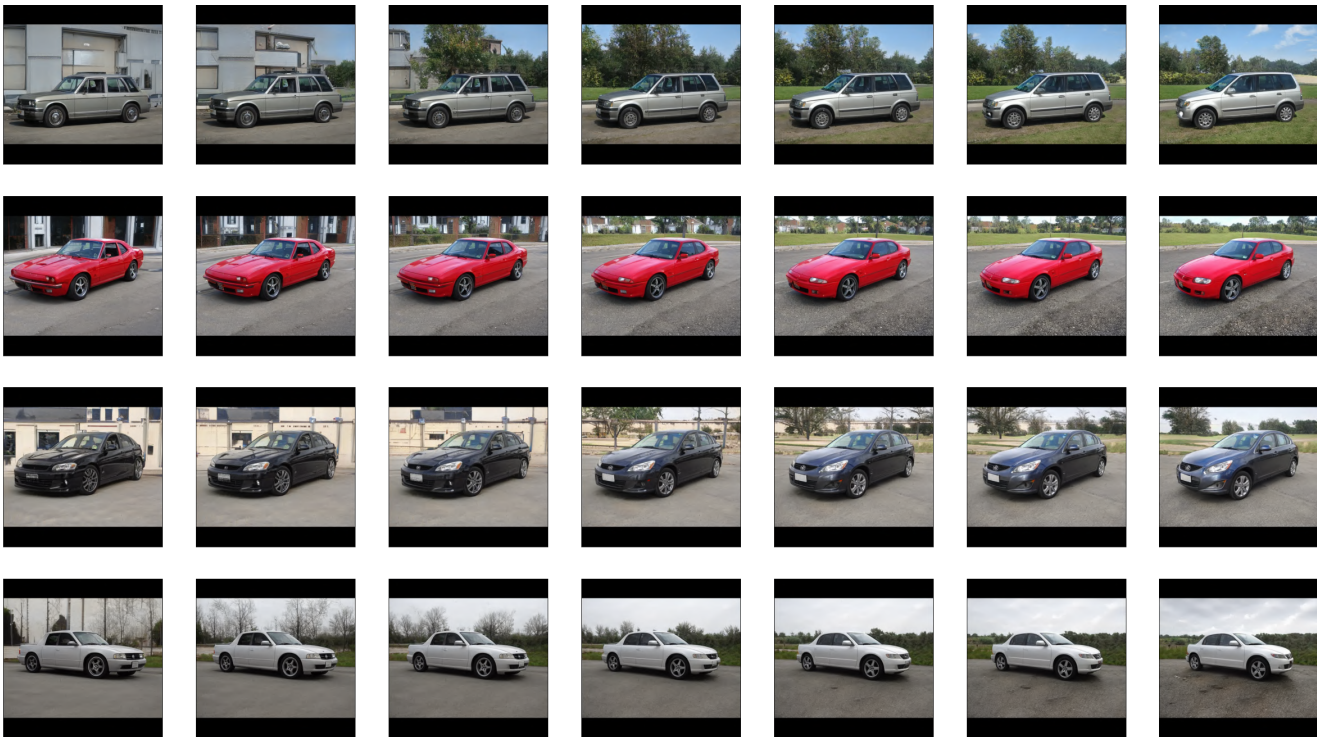

Figure 3: StyleGAN2 Car - Add building in the background



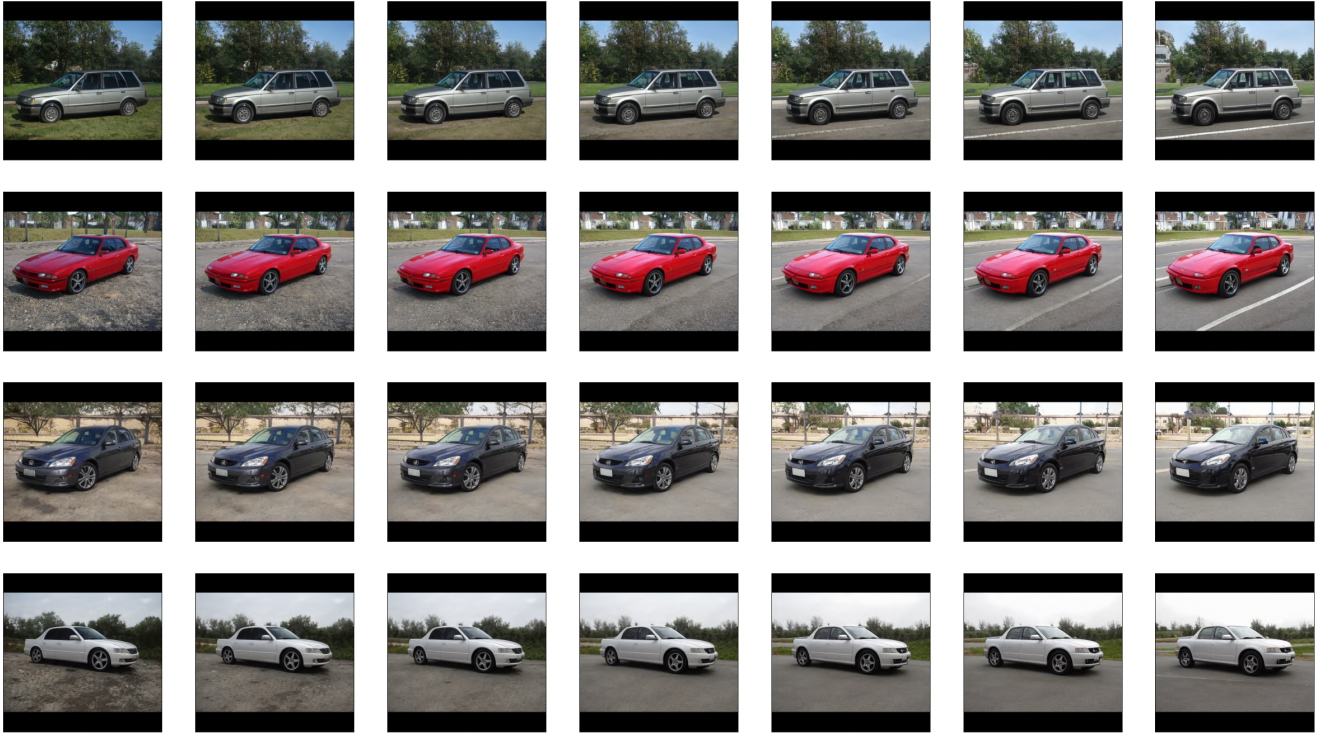

Figure 4: StyleGAN2 Car - Change ground texture

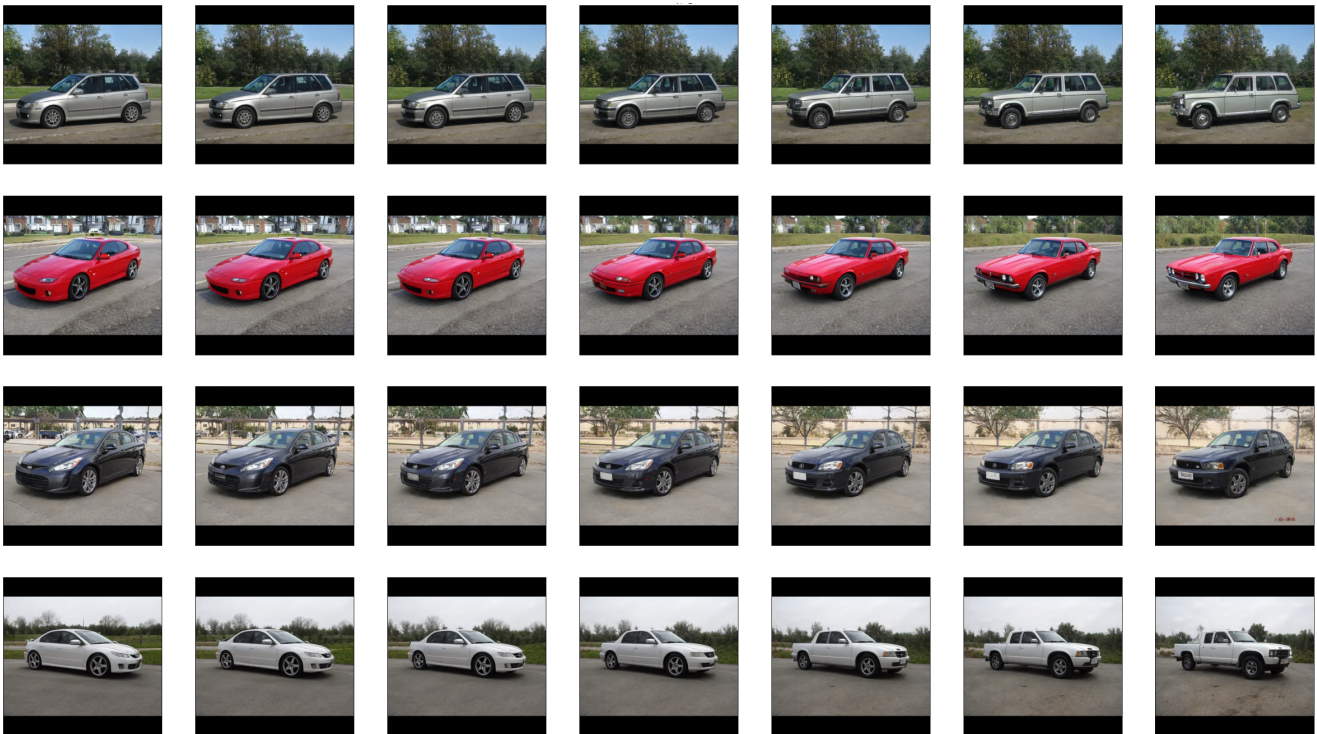

Figure 5: StyleGAN2 Car - Change style of the car

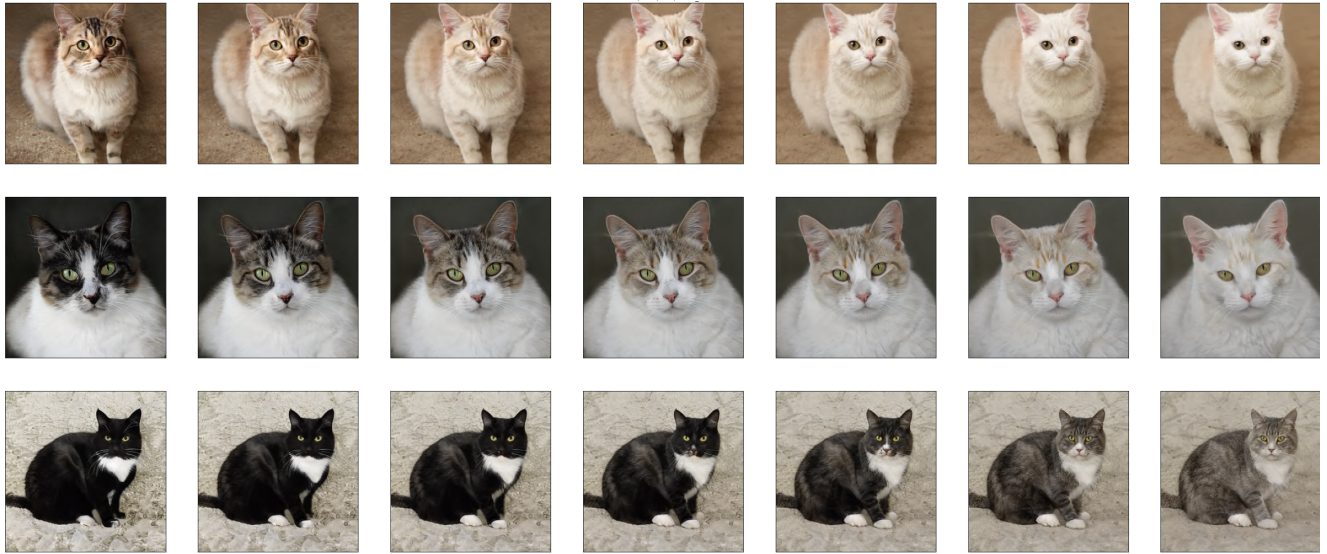

Figure 6: StyleGAN2 Cat - Change breed of the cat

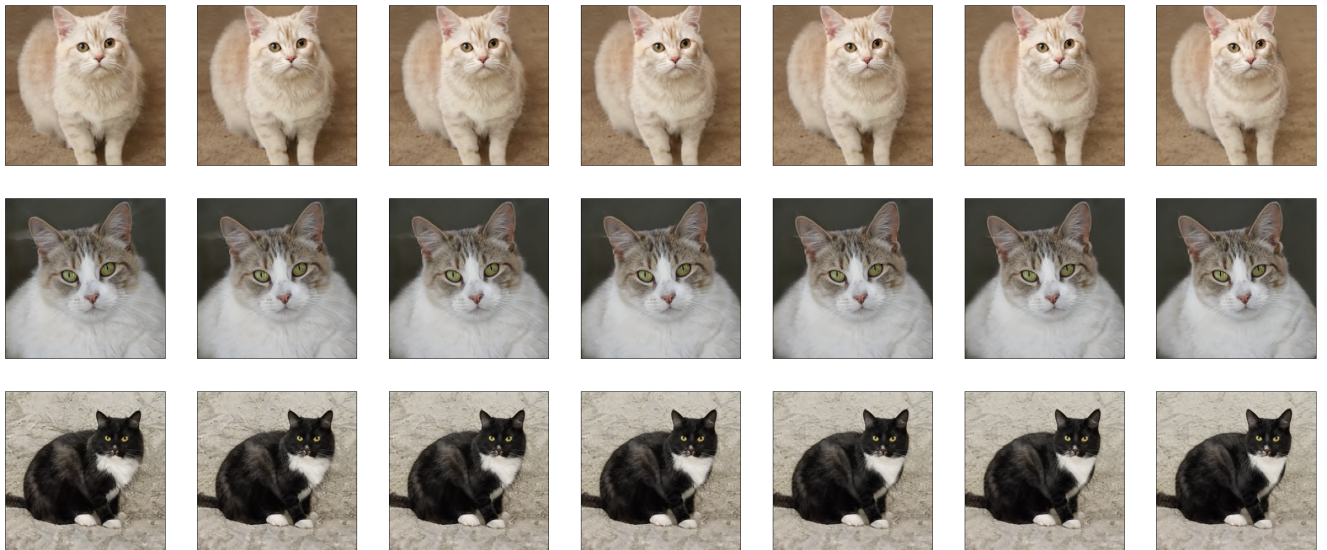

Figure 7: StyleGAN2 Cat - Fluffiness



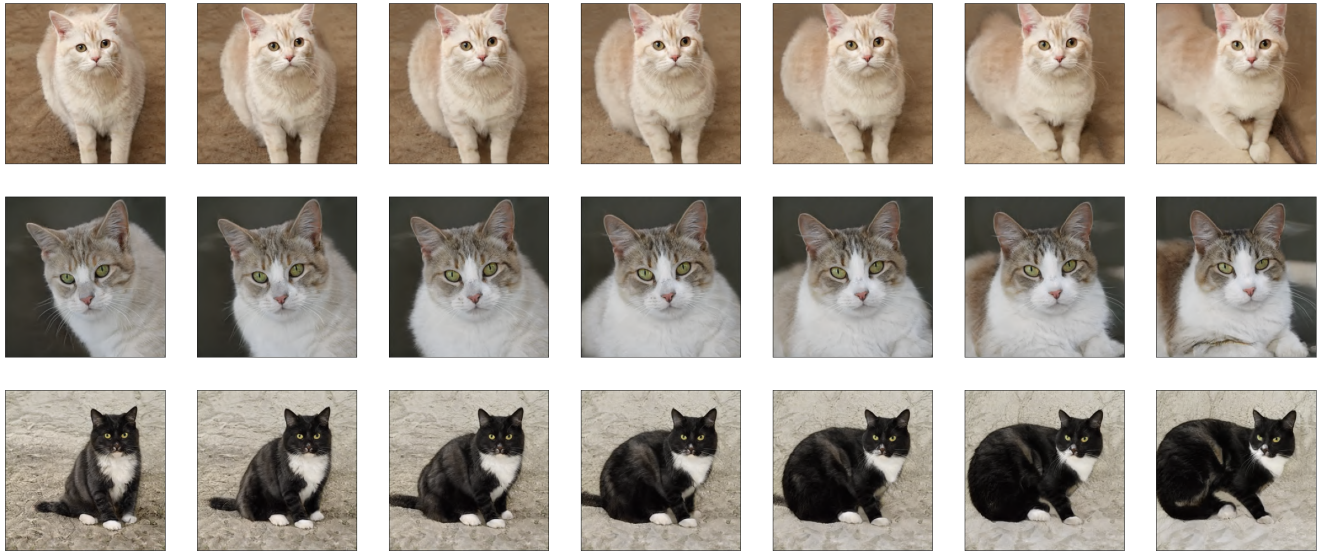

Figure 8: StyleGAN2 Cat - Rotate the cat

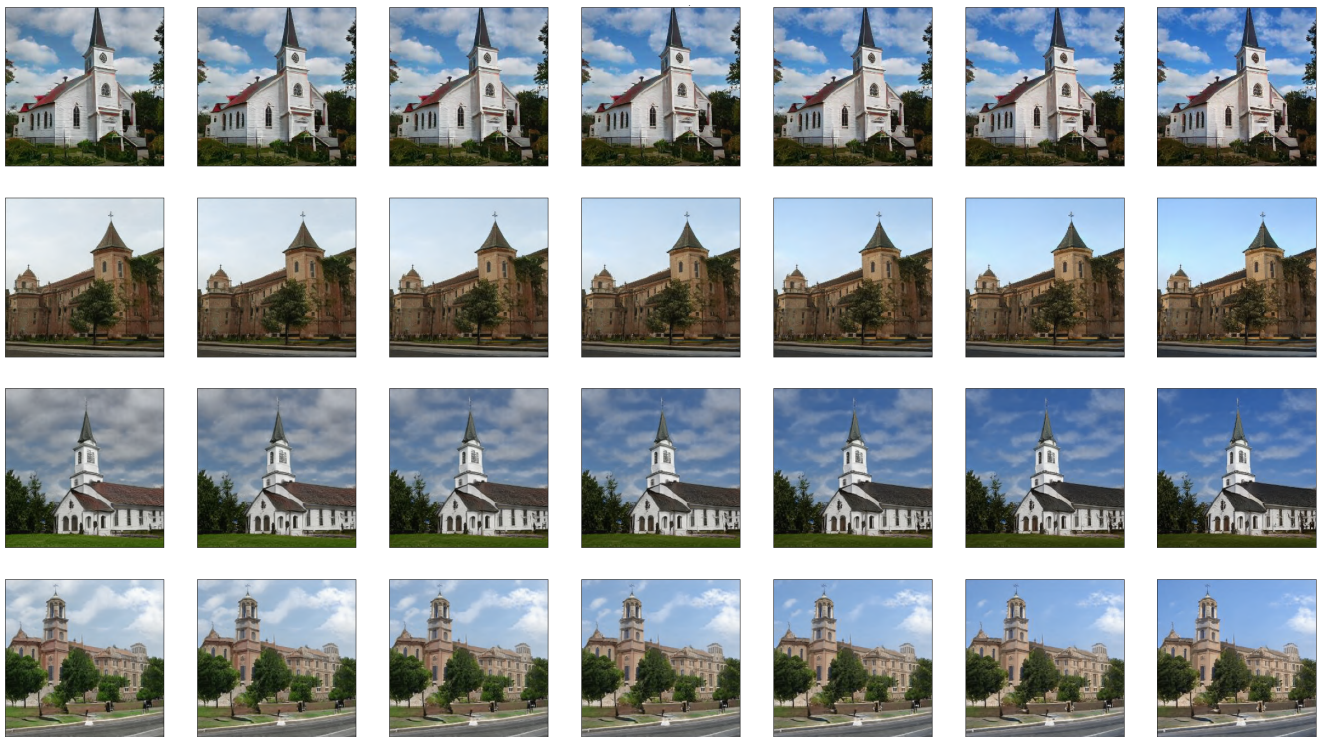

Figure 9: StyleGAN2 Church - Add clouds



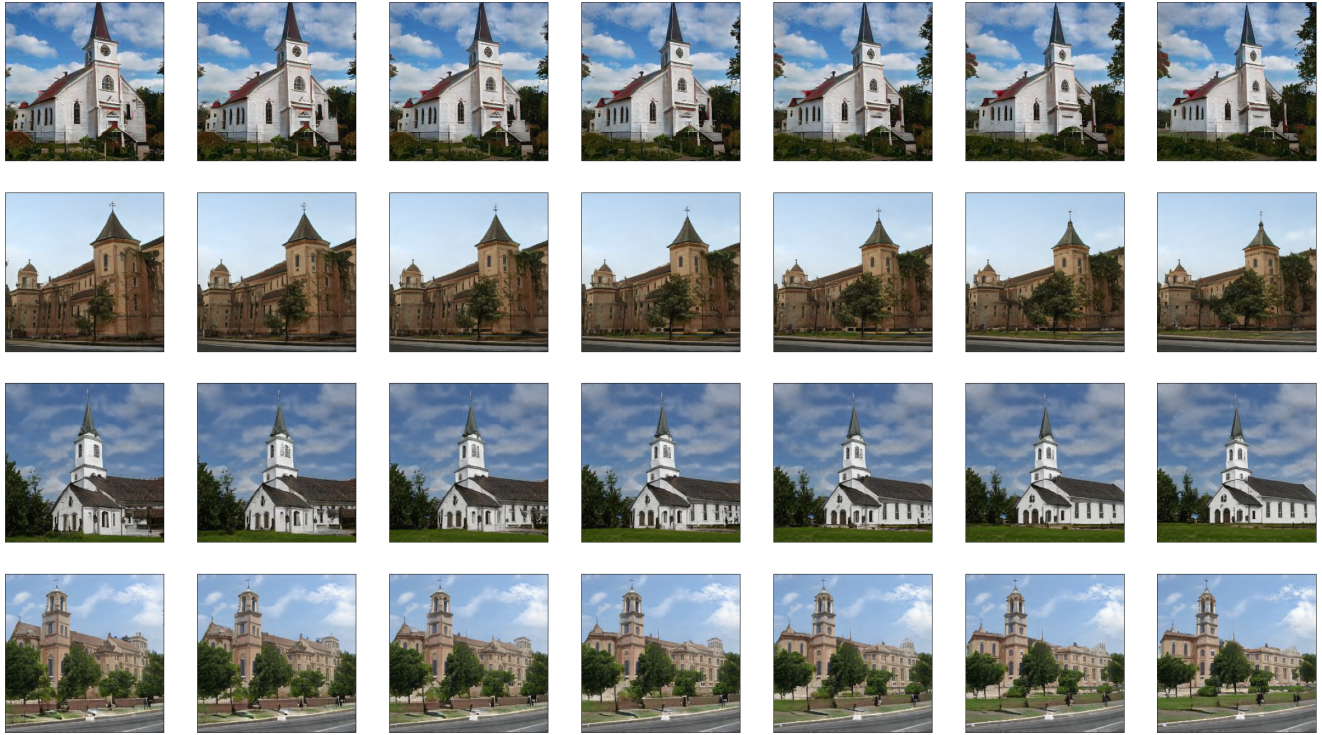

Figure 10: StyleGAN2 Church - Zoom out

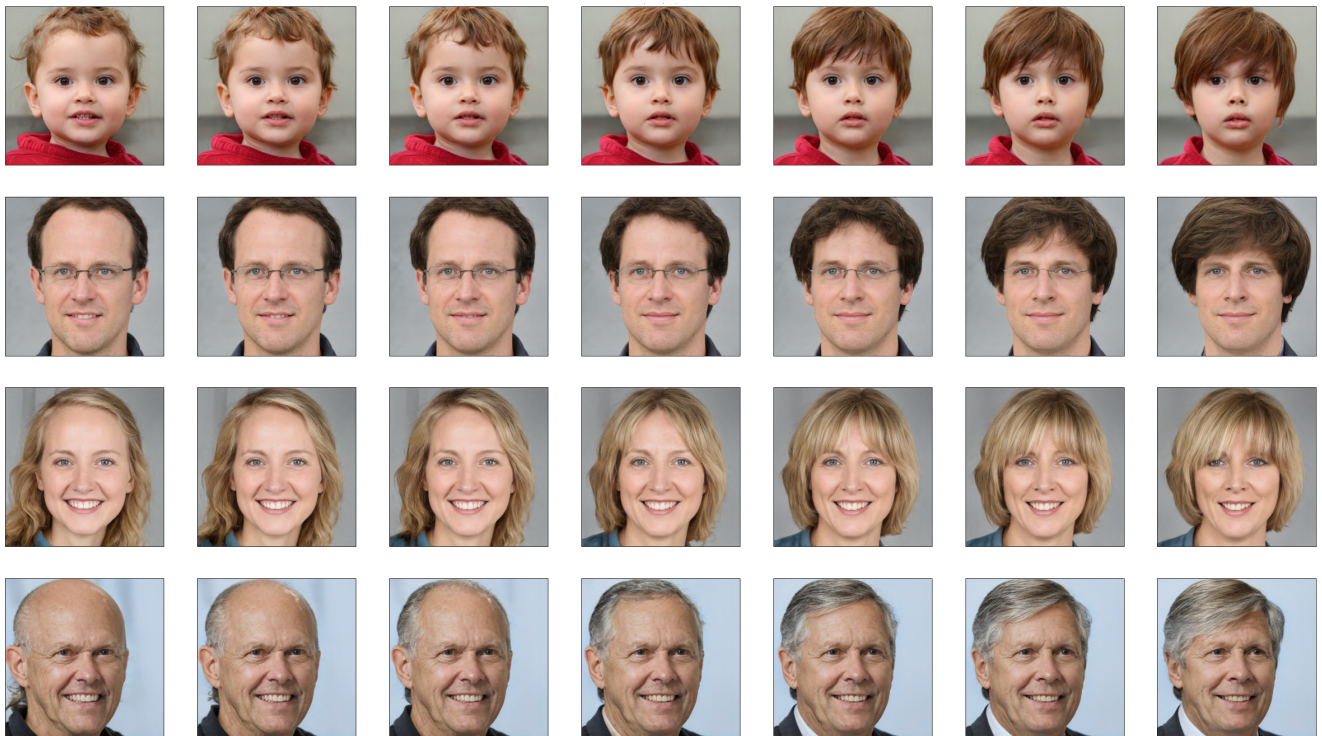

Figure 11: StyleGAN2 FFHQ - Remove forehead hair



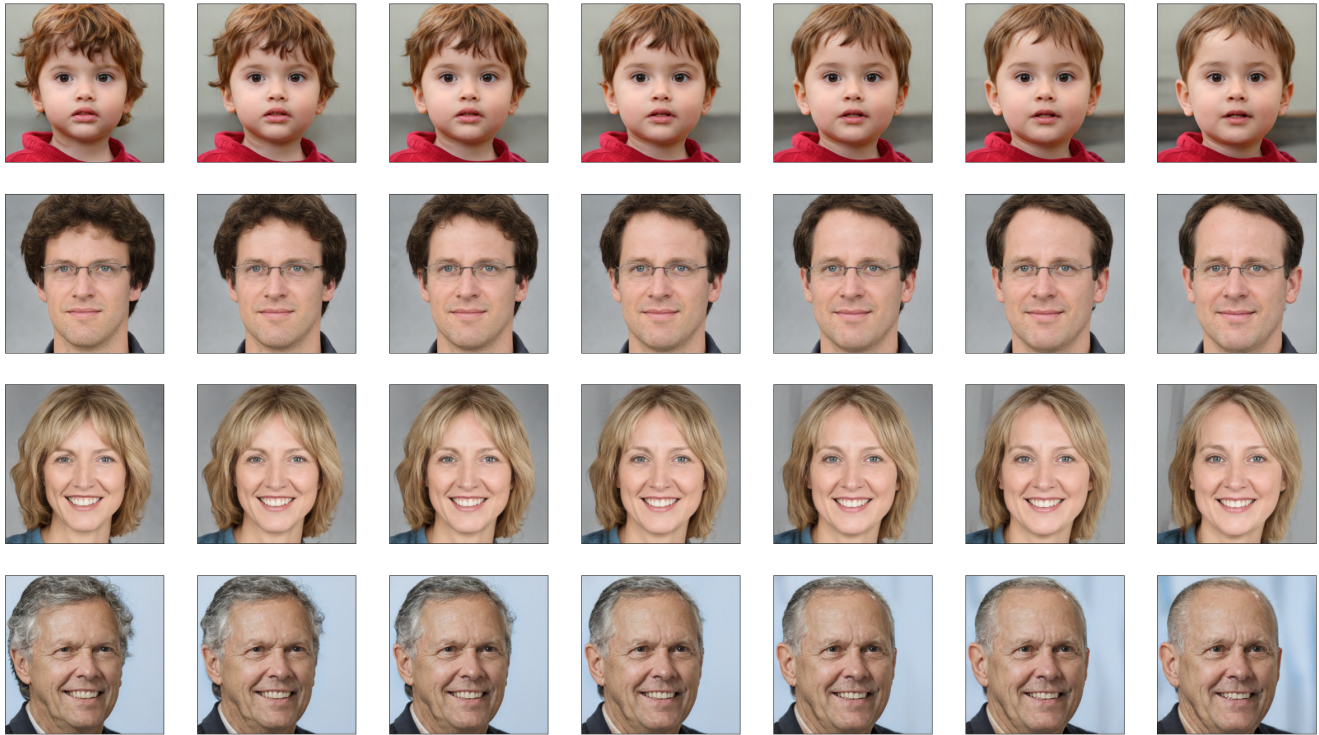

Figure 12: StyleGAN2 FFHQ - Curlier hair

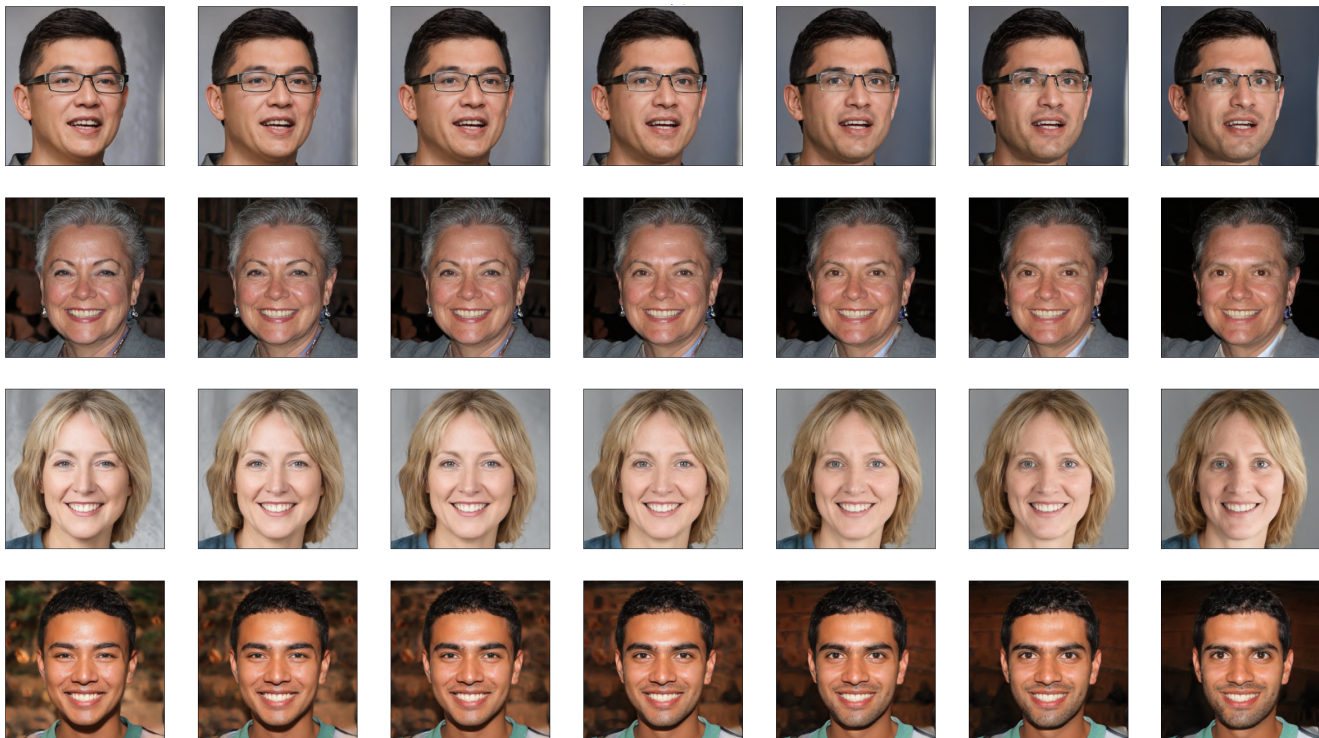

Figure 13: StyleGAN2 FFHQ - Open eyes



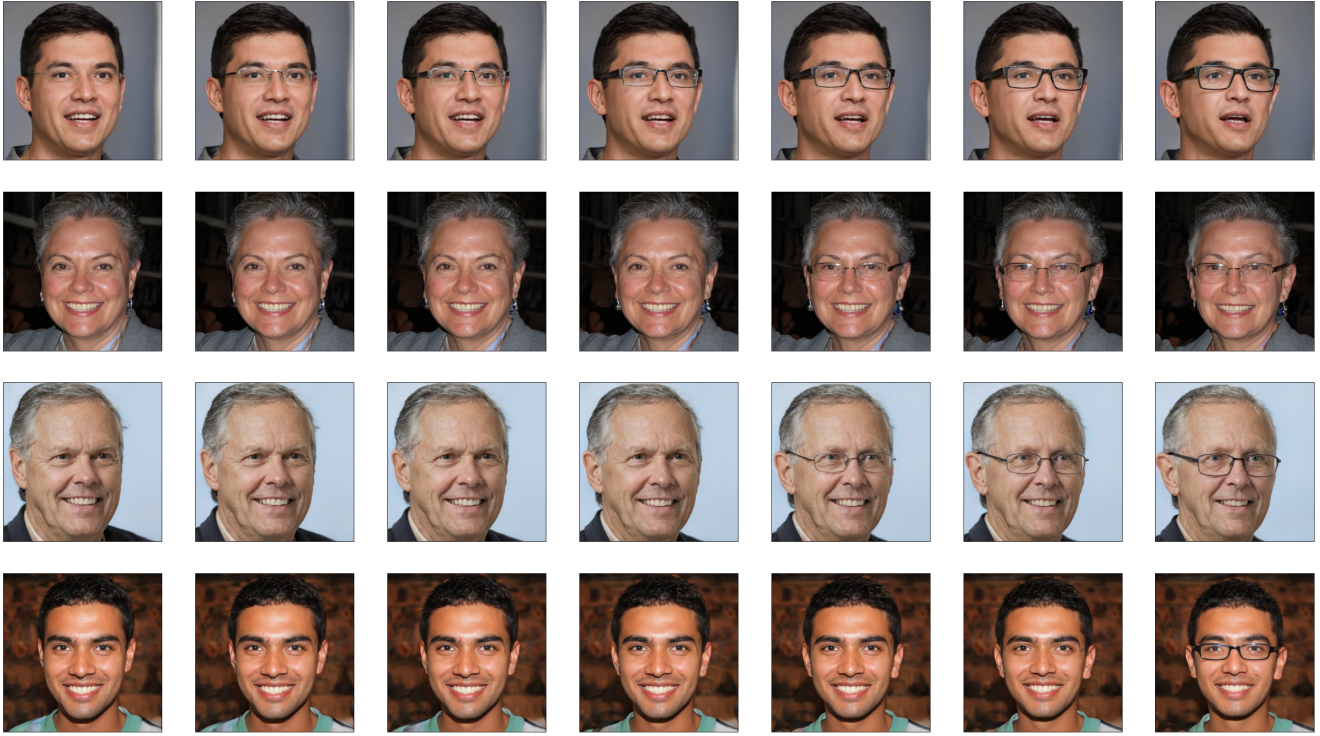

Figure 14: StyleGAN2 FFHQ - Put on glasses

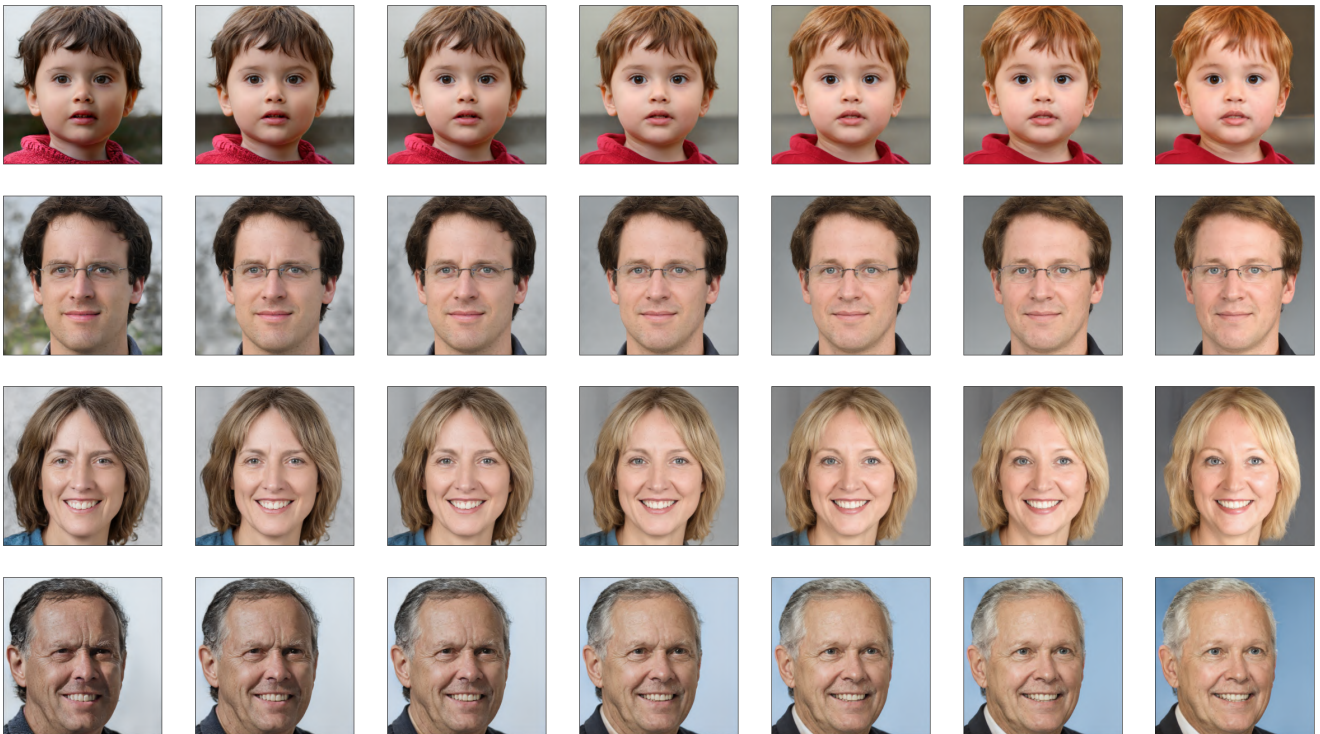

Figure 15: StyleGAN2 FFHQ - Change haircolor



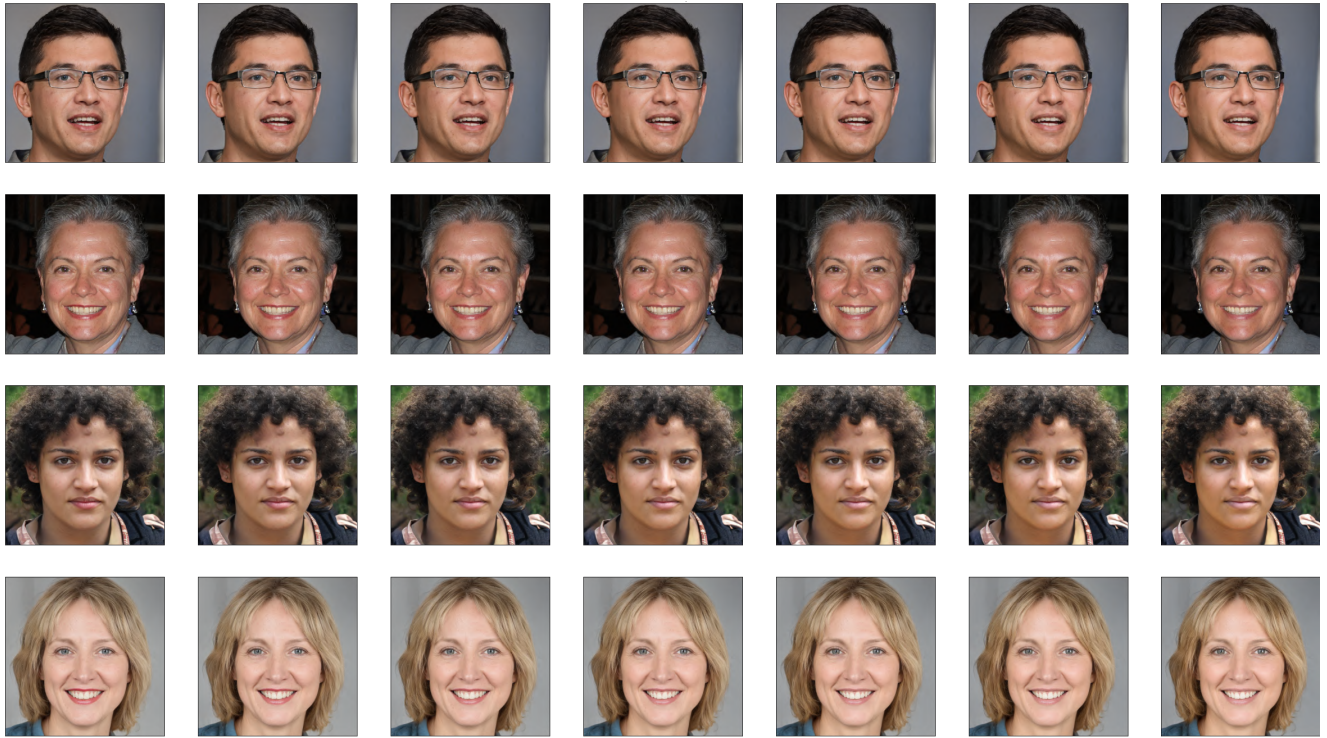

Figure 16: StyleGAN2 FFHQ - Put on a lipstick

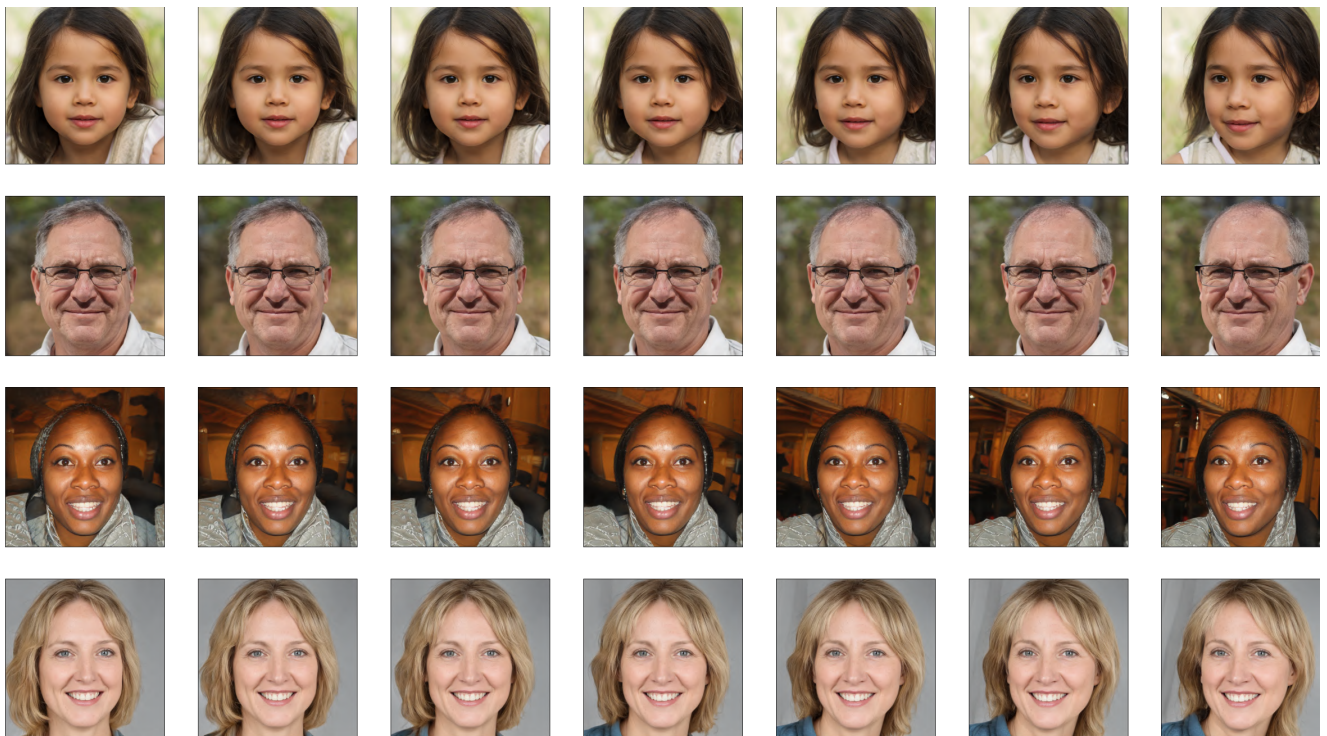

Figure 17: StyleGAN2 FFHQ - Change pose



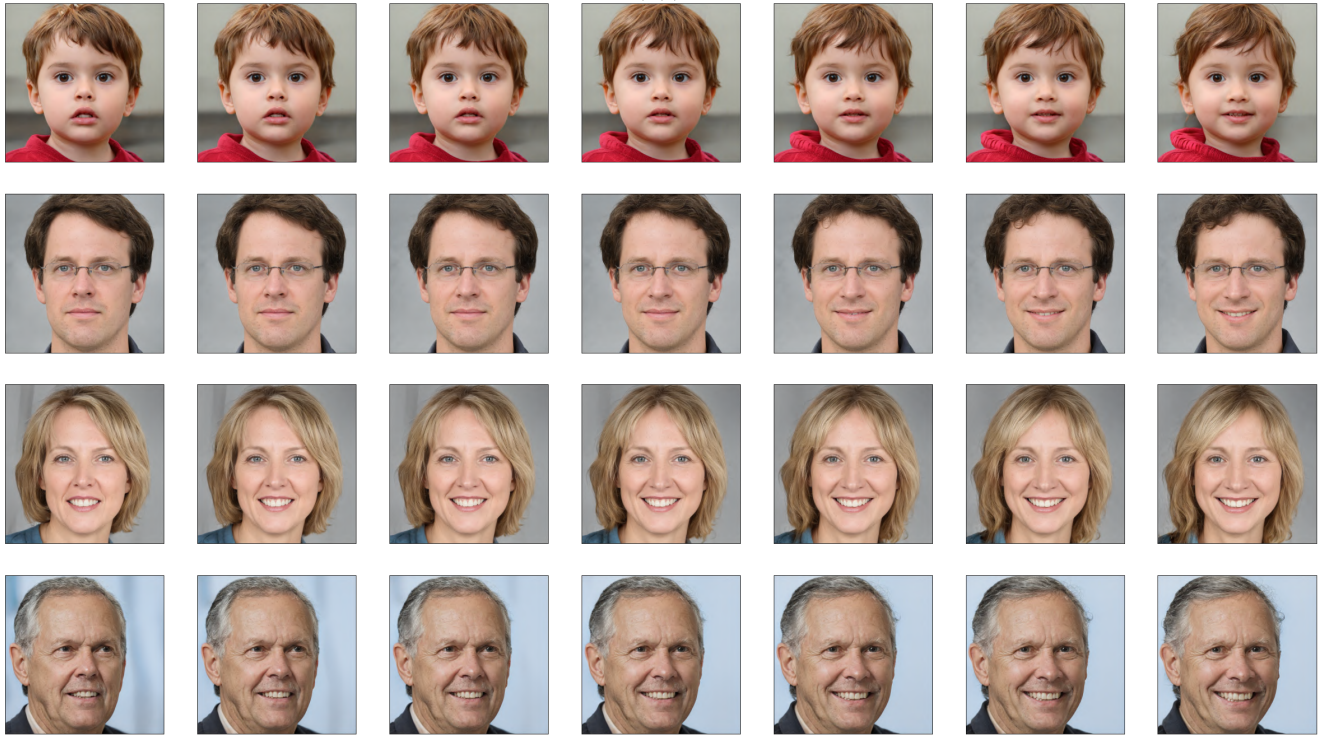

Figure 18: StyleGAN2 FFHQ - Smile

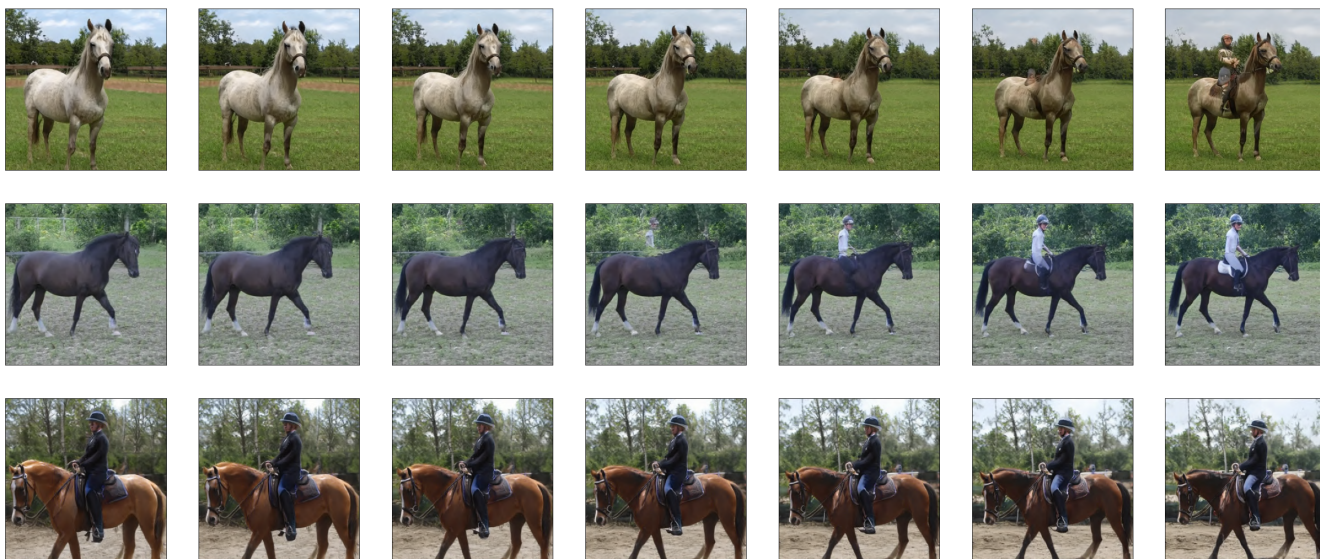

Figure 19: StyleGAN2 Horse - Add a rider



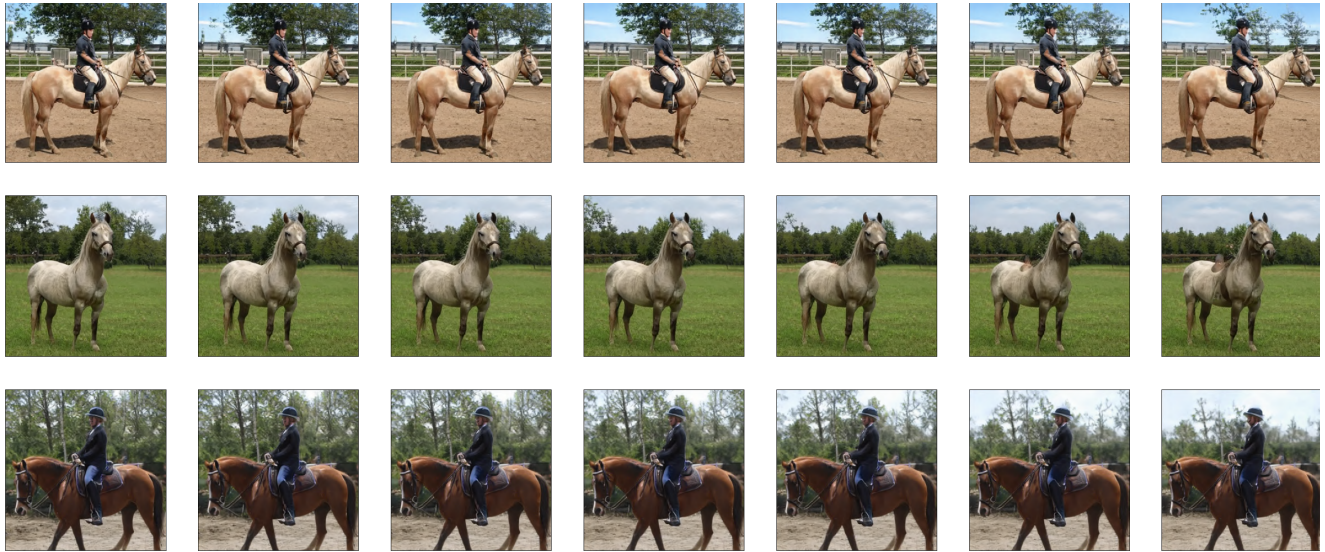

Figure 20: StyleGAN2 Horse - Add trees in the background

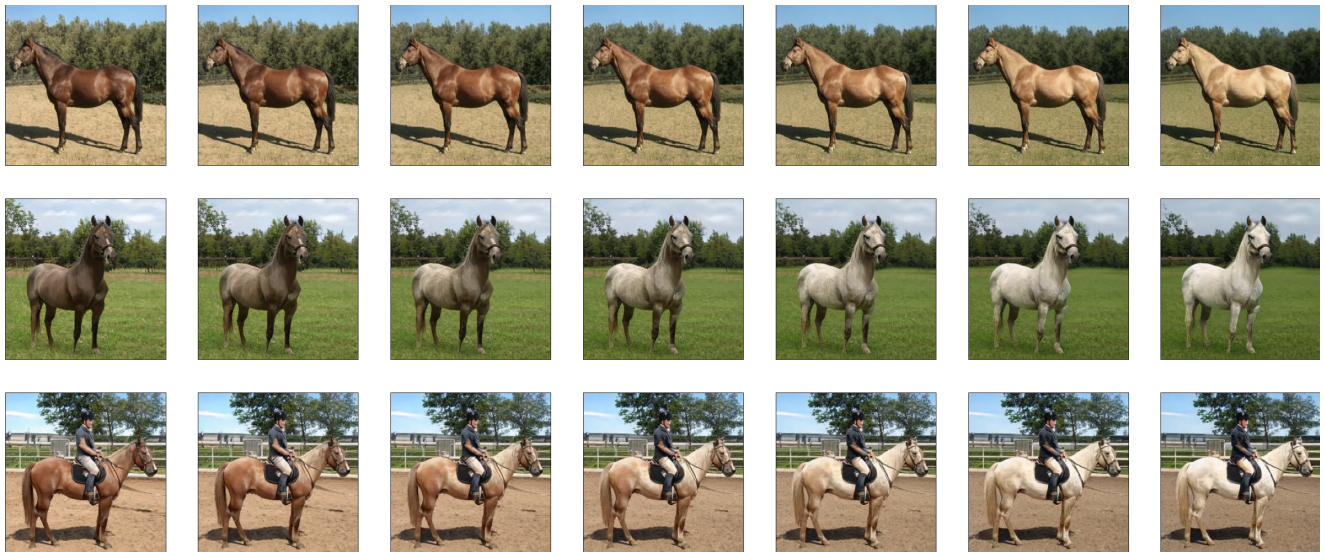

Figure 21: StyleGAN2 Horse - Change coat color

Direction: Zoom

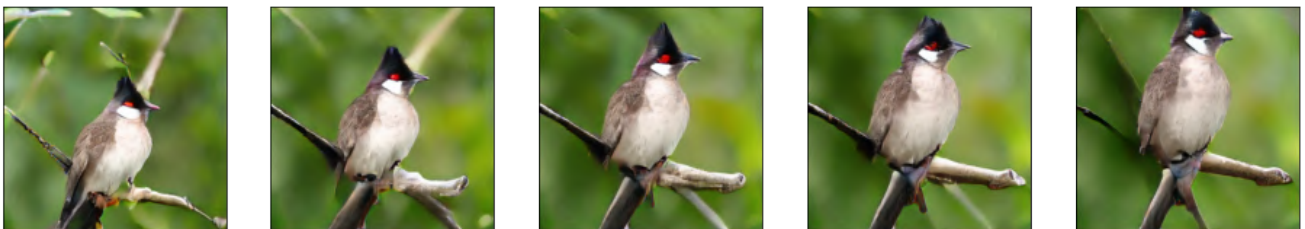

Direction: Zoom

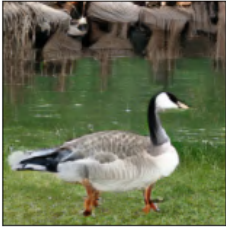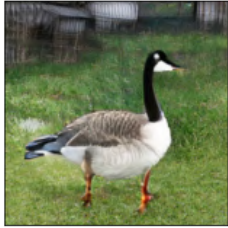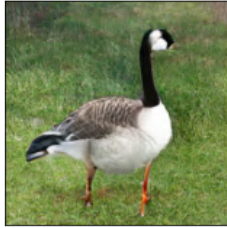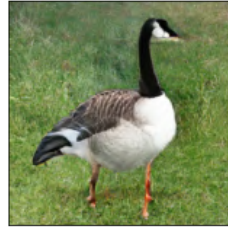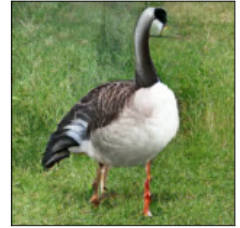

Direction: Zoom

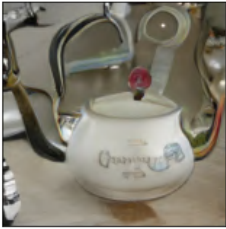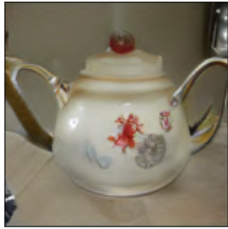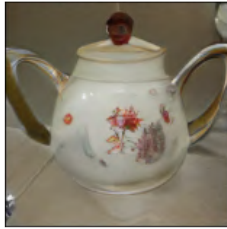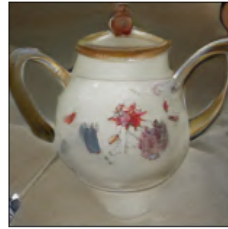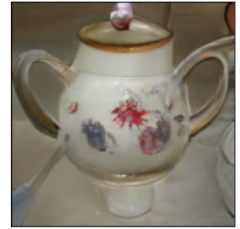

Direction: Zoom

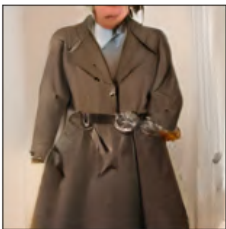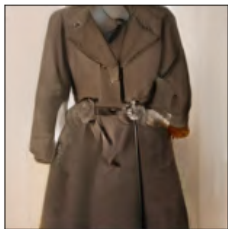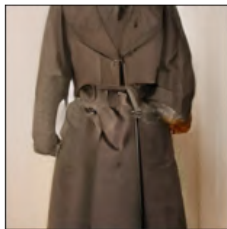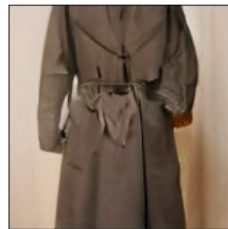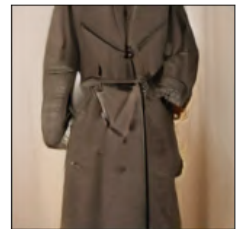

Direction: Zoom

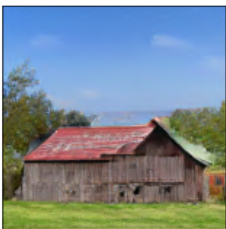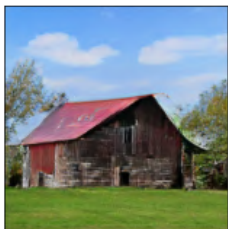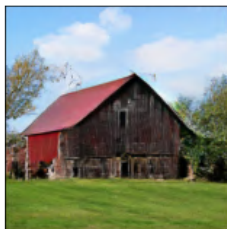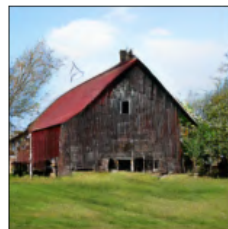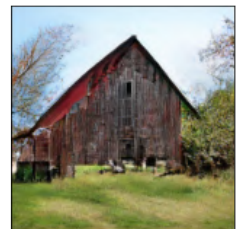

Direction: Rotation

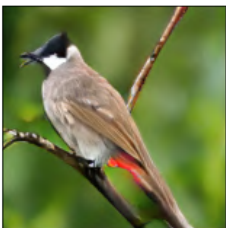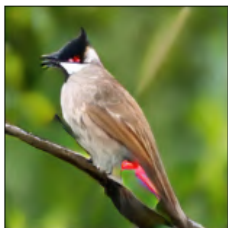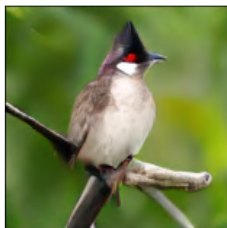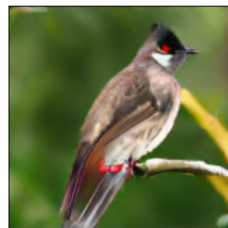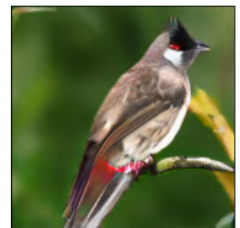



Direction: Rotation

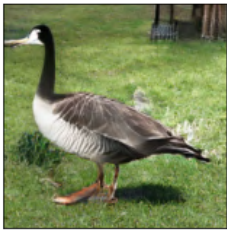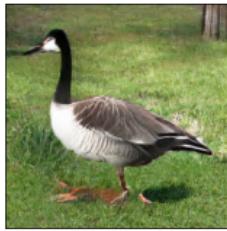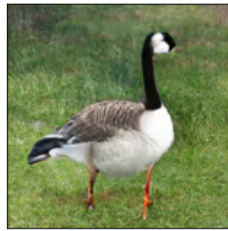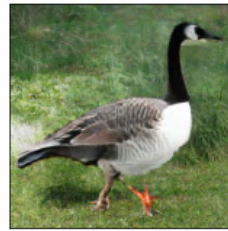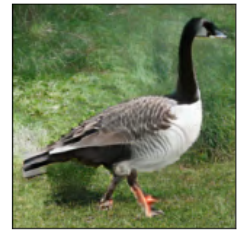

Direction: Rotation

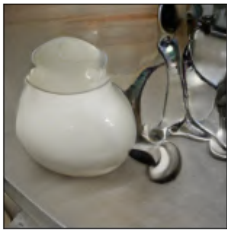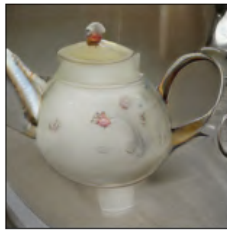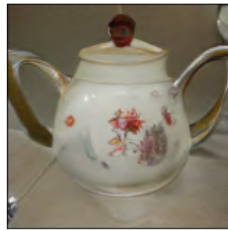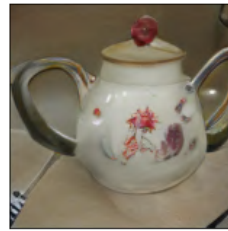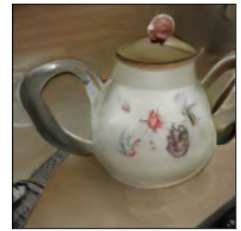

Direction: Rotation

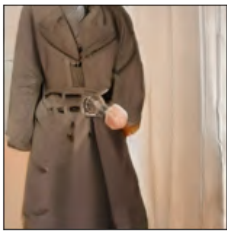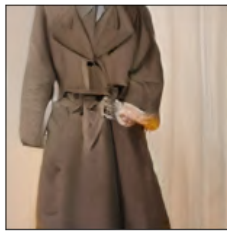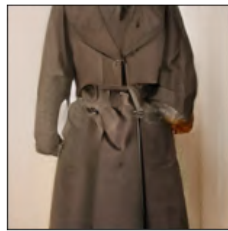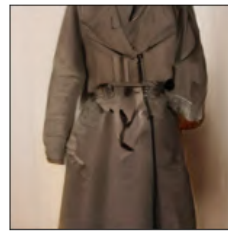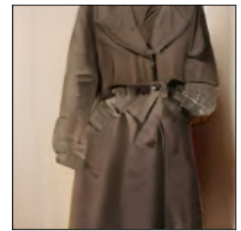

Direction: Rotation

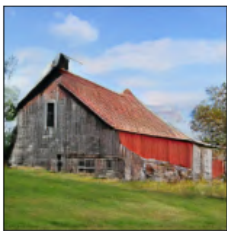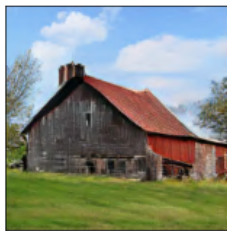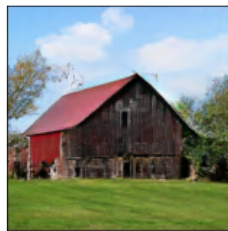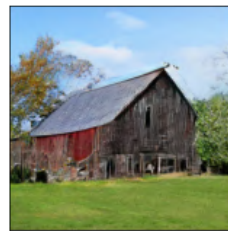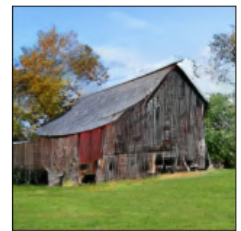

Direction: Background Removal

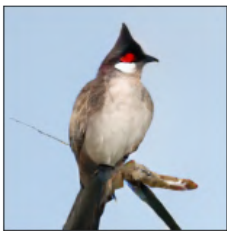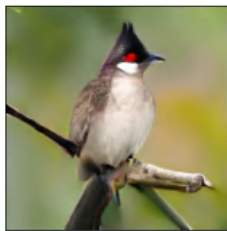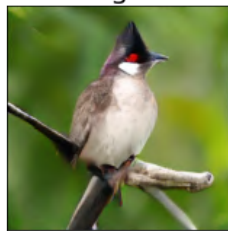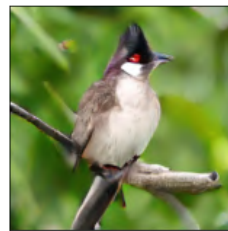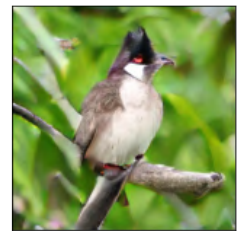

Direction: Background Removal

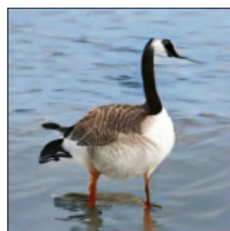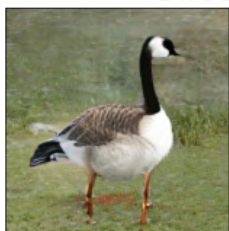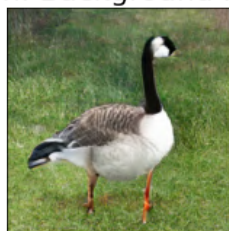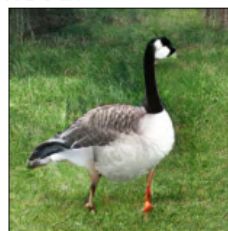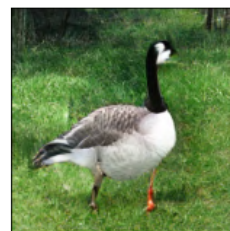

Direction: Background Removal

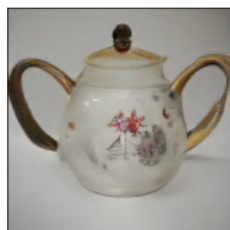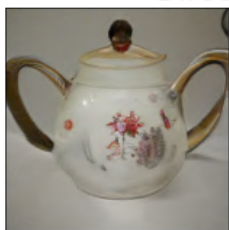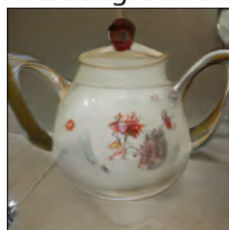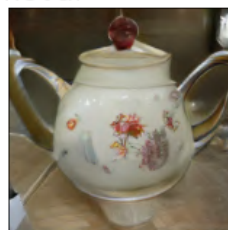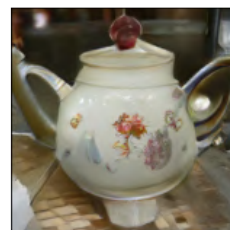

Direction: Background Removal

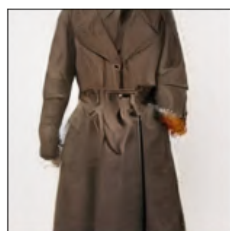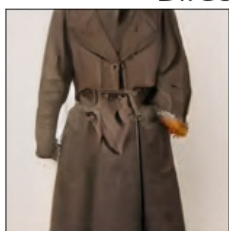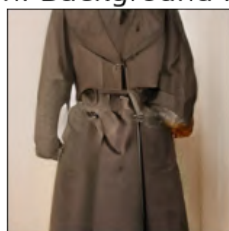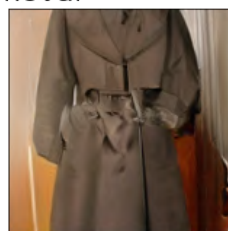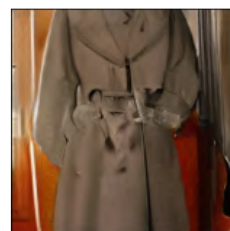

Direction: Background Removal

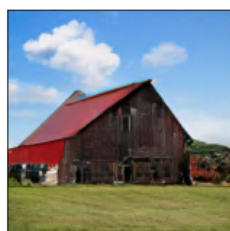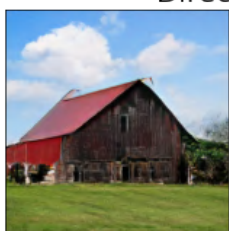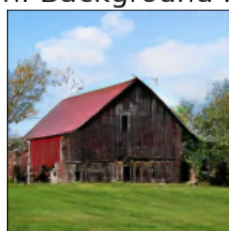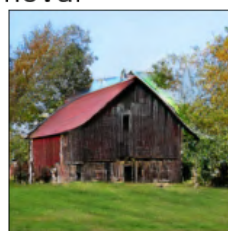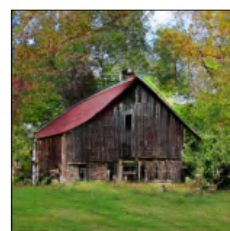

Direction: Contrast

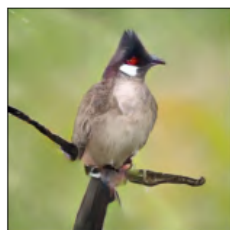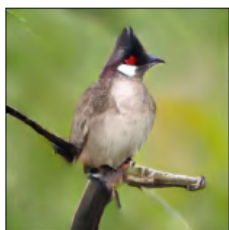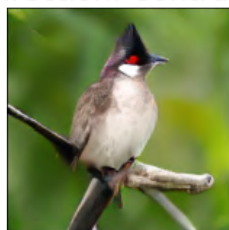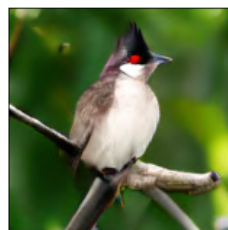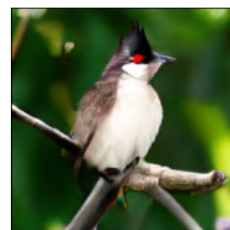



Direction: Contrast

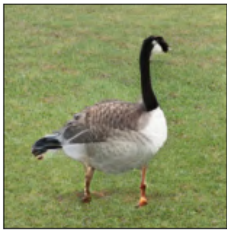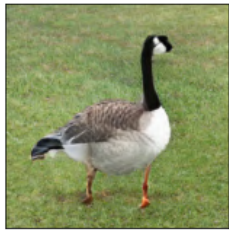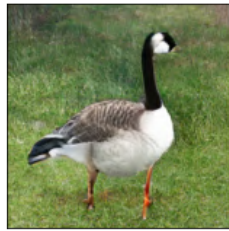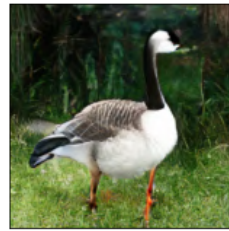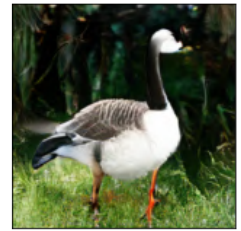

Direction: Contrast

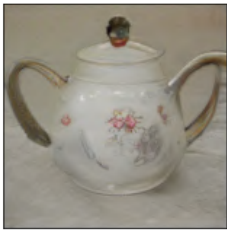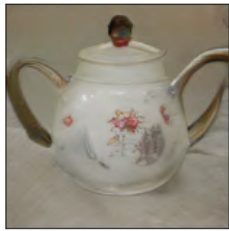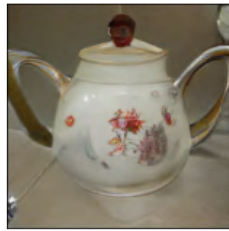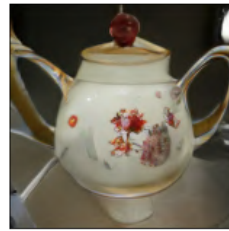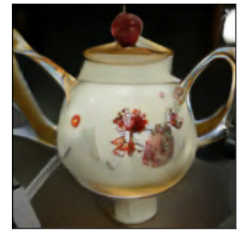

Direction: Contrast

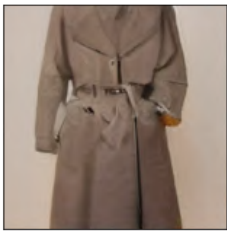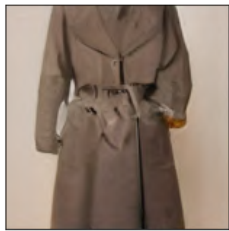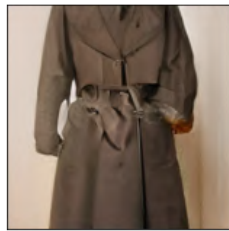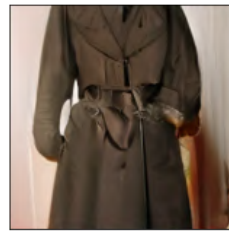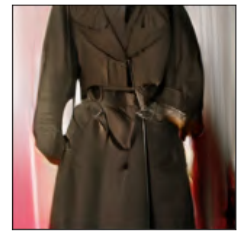

Direction: Contrast

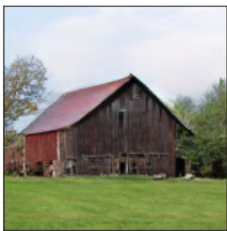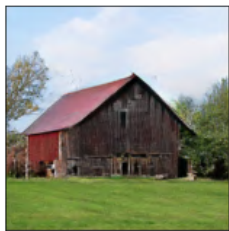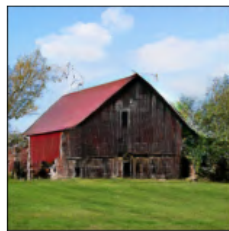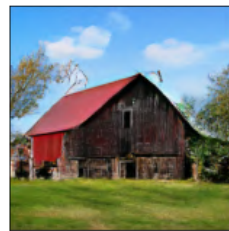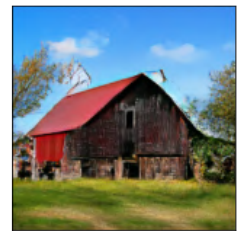

Direction: Add Green

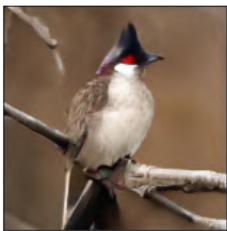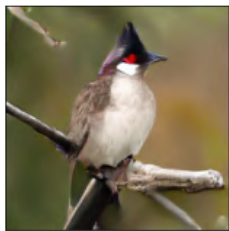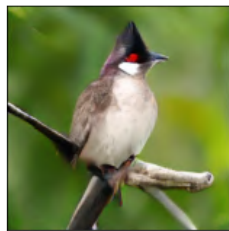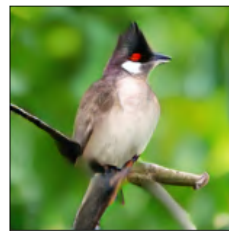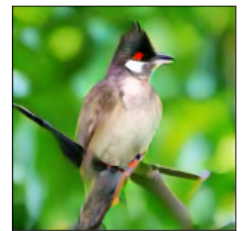

Direction: Add Green

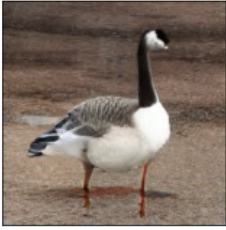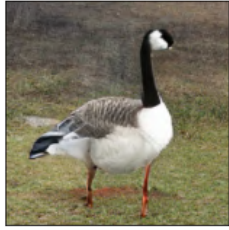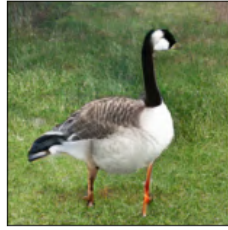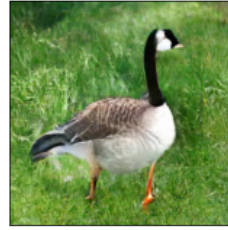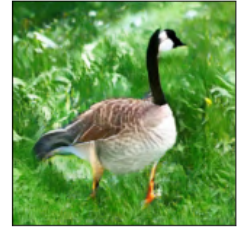

Direction: Add Green

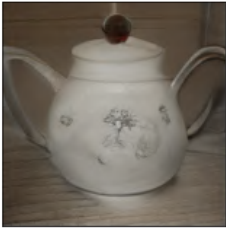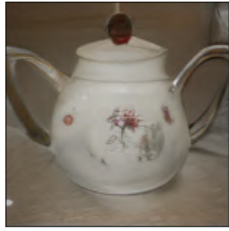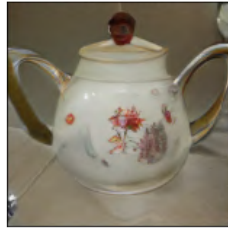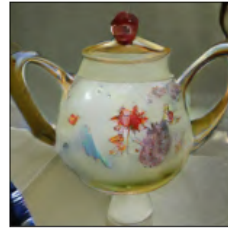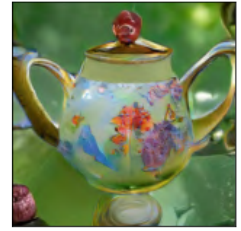

Direction: Add Green

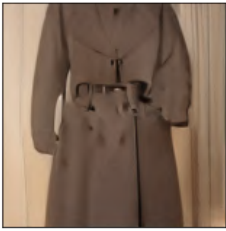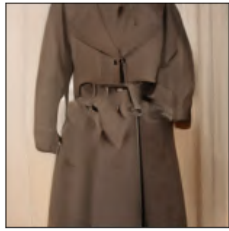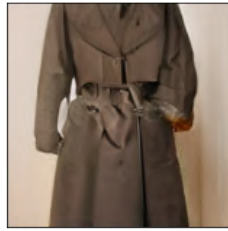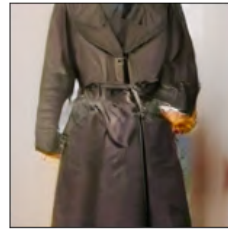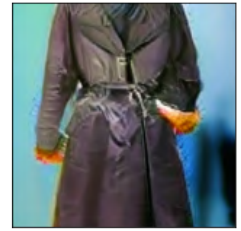

Direction: Add Green

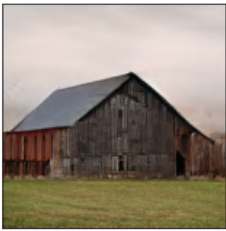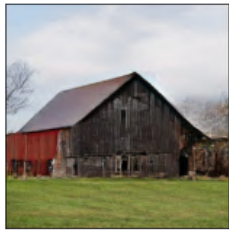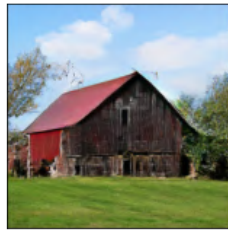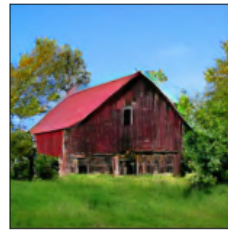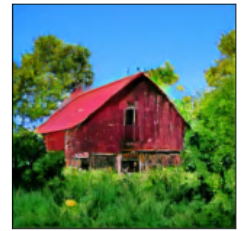

Direction: Add Green

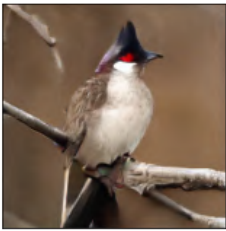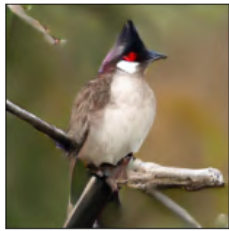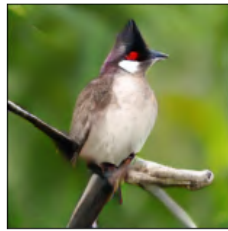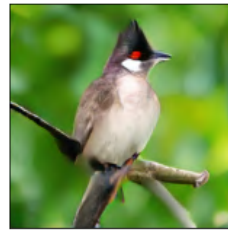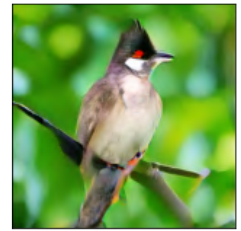

Supplement: Supplementary file 1 [file Yuksel_LatentCLR_A_Contrastive_ICCV_2021_supplemental.pdf]
